# Supplementary material for: Photoinduced and ground state conversions in a cyclic β-thioxoketone
Source: Royal Society of Chemistry journal article supplement (doi:10.1039/d1ra09020h), 2021-12-23
Supplement: d1ra09020h1.pdf [file d1ra09020h1.pdf]

## Photoinduced and Ground State Conversions in a Cyclic $\beta$ -Thioxoketone

Mariusz Pietrzak <sup>2</sup>, Joanna Buczyńska <sup>2</sup>, Fritz Duus <sup>1</sup>, Jacek Waluk <sup>2,3</sup> and Poul Erik Hansen <sup>1</sup>

### Supplementary materials

#### TABLE OF CONTENTS:

Table S1. Results of calculations (B3LYP/6311++G(d,p)).

Figure S1. Plot of <sup>1</sup>H chemical shifts of **MTPO** vs. calculated nuclear shieldings.

Figure S2. <sup>1</sup>H NMR spectra of a mixture of **3** and **4** measured at 198 K.

Figure S3. <sup>1</sup>H-NOESY spectrum of a mixture of **3** and **4** measured at 198 K.

Figure S4. <sup>1</sup>H-NOESY spectrum of almost pure **4** measured at 198 K.

Figure S5. <sup>1</sup>H-NOESY spectrum of **5** and **MTPO** mixture measured at 238 K.

Figure S6. <sup>1</sup>H-COSY spectrum of **5** and **MTPO** mixture measured at 238 K.

Figure S7. <sup>1</sup>H-<sup>13</sup>C HSQC spectrum of **5** and **MTPO** mixture measured at 238 K. Optimized for J = 130 Hz.

Figure S8. <sup>1</sup>H-<sup>13</sup>C HMBC spectrum of **5** and **MTPO** mixture measured at 238 K. Optimized for J = 4 Hz.

Figure S9. Simulated IR spectra for **1** – **6** in CH<sub>2</sub>Cl<sub>2</sub>, with the same intensity scale for each form.

Figure S10. Simulated electronic absorption spectra for **1** – **6** in CH<sub>2</sub>Cl<sub>2</sub>, with the same intensity scale for each form.

Table S1. Results of calculations (B3LYP/6311++G(d,p)).

|           |     | $E(S_0)^a$<br>[kcal/mol] | $S_0-S_1^b$<br>[nm/cm <sup>-1</sup> /f] | $S_0-S_2^b$<br>[nm/cm <sup>-1</sup> /f] | $\mu(S_0)^c$<br>[D] | <sup>1</sup> H<br>[ppm] | IR Freq <sup>d</sup><br>[cm <sup>-1</sup> ] |
|-----------|-----|--------------------------|-----------------------------------------|-----------------------------------------|---------------------|-------------------------|---------------------------------------------|
| <b>1</b>  | vac | 0.0 (0.0)                | 455/22.0/0.0004                         | 325/30.8/0.23                           | 4.04                | 16.94                   | 2777 (OHs) 1575 (OHb)                       |
|           | DCM | 0.0 (0.0)                | 443/22.6/0.0005                         | 335/29.8/0.30                           | 5.61                | 16.93                   | 2754 (OHs) 1558 (OHb)                       |
|           | exp |                          | 475/21.1                                | 376/26.6                                |                     | 16.8                    |                                             |
| <b>2</b>  | vac | 4.66 (2.68)              | 353/28.3/0.0008                         | 309/32.3/0.21                           | 3.66                | 14.20                   | 2259 (SHs) 1631 (COs)<br>1489 (def, SHb)    |
|           | DCM | 4.40 (2.50)              | 347/28.8/0.0014                         | 315/31.7/0.27                           | 4.92                | 13.58                   | 2303 (SHs) 1611 (COs)<br>1474 (def, SHb)    |
|           | exp |                          |                                         |                                         |                     |                         |                                             |
| <b>2a</b> | vac | 6.88 (5.30)              | 351/28.5/0.0002                         | 294/34.0/0.21                           | 4.24                | 3.92                    | 2601 (SHs) 1694 (COs)<br>1530 (def, SHb)    |
|           | DCM | 4.77 (3.35)              | 345/29.0/0.0007                         | 308/32.5/0.35                           | 5.76                | 4.35                    | 2624 (SHs) 1665 (COs)<br>1515 (def, SHb)    |
|           | exp |                          |                                         | 286/35.0                                |                     |                         |                                             |
| <b>3</b>  | vac | 6.40 (4.38)              | 339/29.5/0.0018                         | 283/35.3/0.24                           | 2.04                | 3.72                    | 2697 (SHs, vw) 1720(COs) 1585 (def)         |
|           | DCM | 5.50 (3.55)              | 328/30.5/0.0078                         | 299/33.4/0.38                           | 2.87                | 3.99                    | 2695 (SHs, vw) 1695(COs) 1580 (def)         |
|           | exp |                          |                                         | 286/35.0                                |                     | 3.25                    |                                             |

|          |     |                 |                 |                |      |                           |                                         |
|----------|-----|-----------------|-----------------|----------------|------|---------------------------|-----------------------------------------|
|          |     |                 |                 |                |      |                           |                                         |
| <b>4</b> | vac | 10.65<br>(8.27) | 266/37.6/0.0044 | 257/38.9/0.096 | 1.20 | 4.80(OH)<br>2.47(SH)      | 3731 (OHs) 2668 (SHs,vw) 1706 (def COH) |
|          | DCM | 10.92<br>(8.49) | 261/38.2/0.0073 | 256/39.0/0.18  | 1.61 | 5.02(OH)<br>2.76(SH)      | 3720 (OHs) 2672 (SHs,vw) 1704 (def COH) |
|          | exp |                 |                 | 268/37.3       |      | 5.0 (OH)<br>2.6 (SH)      |                                         |
|          |     |                 |                 |                |      |                           |                                         |
| <b>5</b> | vac | 7.51 (5.09)     | 301/33.2/0.0029 | 234/42.7/0.077 | 3.78 | 3.99                      | 2653 (SH, w) 1768 (COs)                 |
|          | DCM | 6.21 (3.88)     | 295/33.9/0.0043 | 231/43.2/0.10  | 5.08 | 3.96                      | 2662 (SH, w) 1737 (COs)                 |
|          | exp |                 |                 |                |      | 3.62<br>(CH)<br>2.6 (SH)  |                                         |
|          |     |                 |                 |                |      |                           |                                         |
| <b>6</b> | vac | 5.75 (5.69)     | 499/20.0/0.0    | 302/33.1/0.014 | 3.66 |                           | 1774 (COs) 1040 (CSs)                   |
|          | DCM | 4.16 (4.18)     | 491/20.4/0.0    | 317/31.6/0.021 | 5.91 |                           | 1743 (COs) 1032 (CSs)                   |
|          |     |                 |                 |                |      |                           |                                         |
| <b>7</b> | vac | 6.32 (5.05)     | 271/36.9/0.0056 | 251/39.8/0.087 | 2.01 | 4.06<br>(CH)<br>1.96 (SH) | 2668 (SH)                               |
|          | DCM | 6.27 (5.09)     | 263/38.0/0.016  | 251/39.8/0.18  | 2.78 | 4.20                      | 2671 (SH)                               |

|              |     |                  |                 |               |      |                   |           |
|--------------|-----|------------------|-----------------|---------------|------|-------------------|-----------|
|              |     |                  |                 |               |      | (CH)<br>2.37 (SH) |           |
|              |     |                  |                 |               |      |                   |           |
| <b>1anti</b> | vac | 11.46<br>(11.70) | 543/18.4/0.0008 | 330/30.3/0.27 | 2.85 | 5.80              | 3814 (OH) |
|              | DCM | 10.85<br>(11.16) | 523/19.1/0.0012 | 343/29.2/0.38 | 4.55 | 6.26              | 3801(OH)  |

<sup>a</sup> in parentheses, zero-point energy-corrected values; <sup>b</sup> calculated transition wavelength in nm, wavenumbers/10<sup>3</sup>, oscillator strength; <sup>c</sup> ground state dipole moment <sup>d</sup> b: bend, s: stretch.

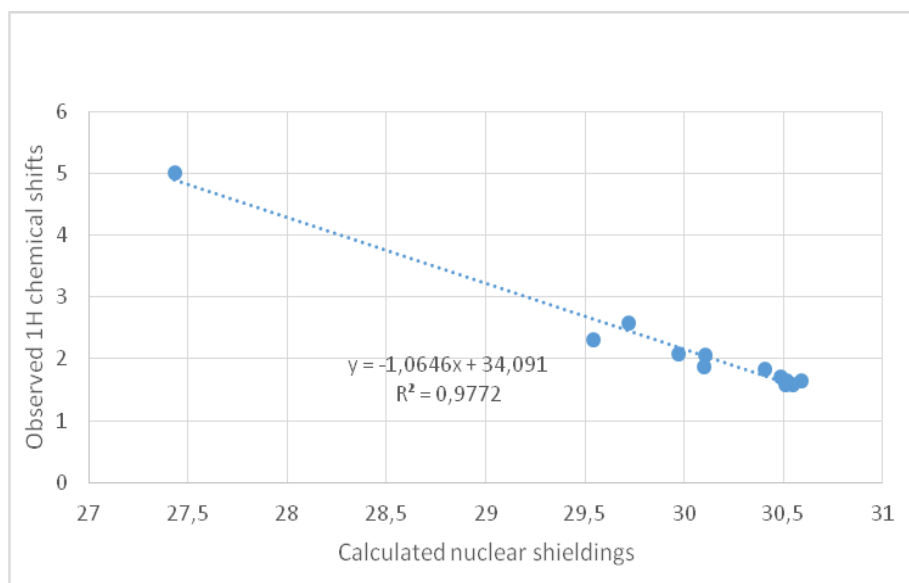

Figure S1. Plot of <sup>1</sup>H chemical shifts of **MTPO** vs. calculated nuclear shieldings.

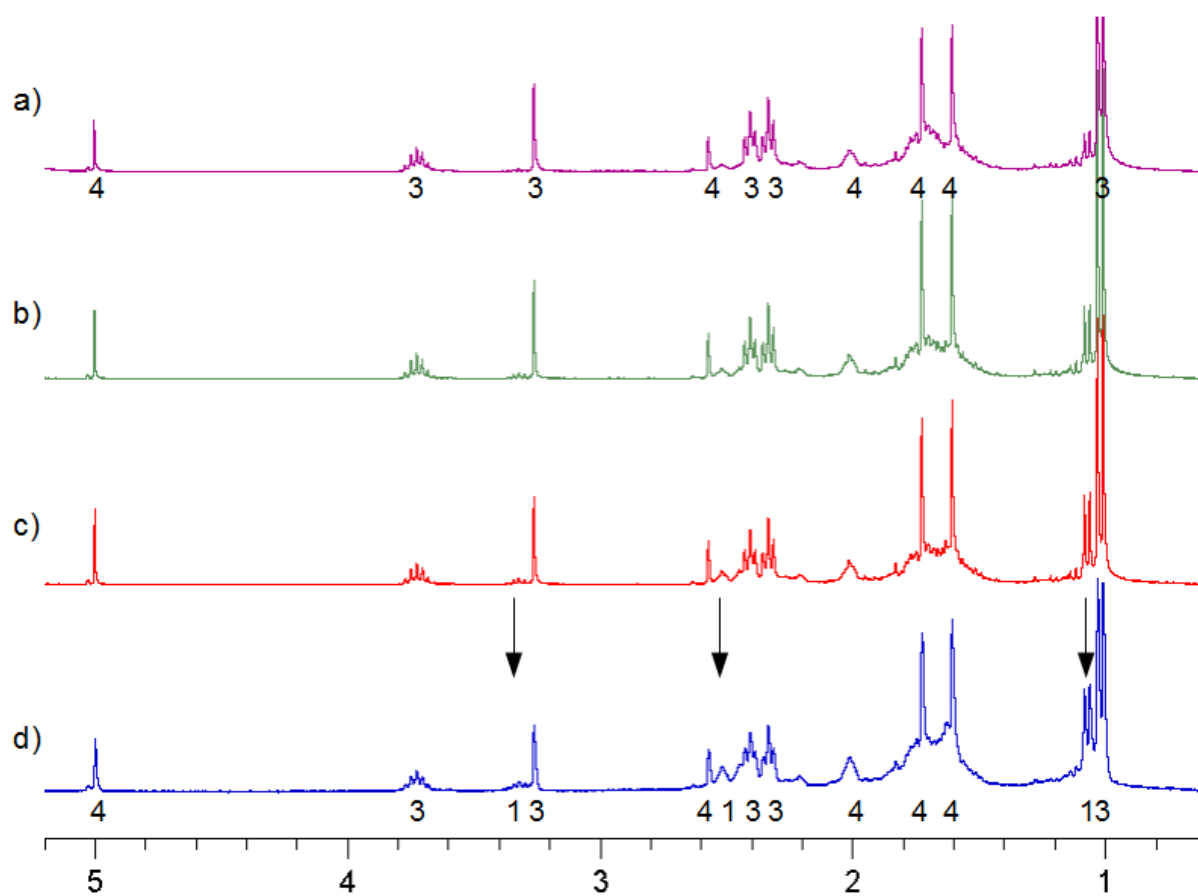

Figure S2. <sup>1</sup>H NMR spectra of **MTPO** (3.0 mg in 0.6 ml CD<sub>2</sub>Cl<sub>2</sub>) after irradiation at 198 K for 2 hours resulting in a mixture of **3** and **4** measured at 198 K in the dark. a) just after irradiation; b) after 4 hours in the dark; c) after 8 hours in the dark; d) after 12 hours in the dark. The arrows indicate appearing signals of **MTPO**.

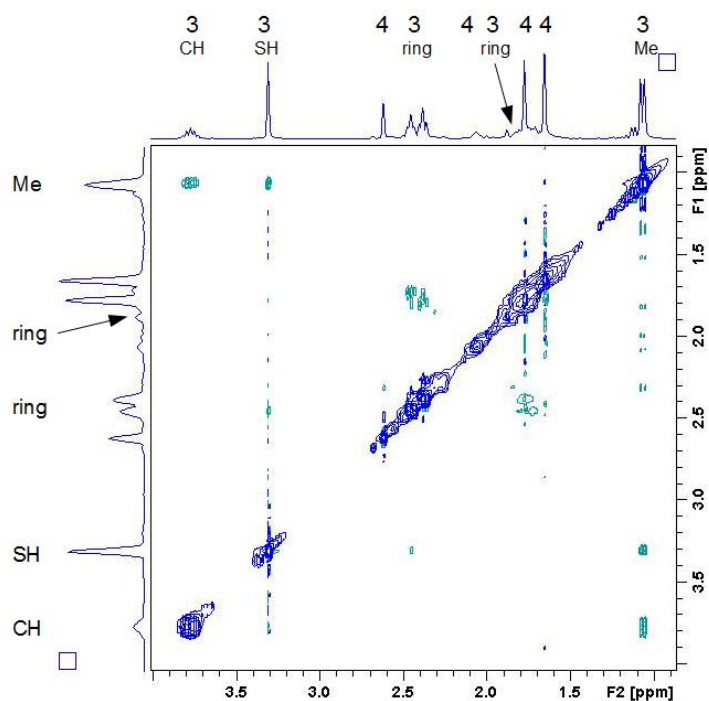

Figure S3.  $^1\text{H}$ -NOESY spectrum of compound **MTPO** (3.0 mg in 0.6 ml  $\text{CD}_2\text{Cl}_2$ ) after irradiation for 2 hours with UV-light at 198 K resulting in **3** and **4** mixture. The line assignment is shown with numbers and arrows. Mixing time was 0.7 s.

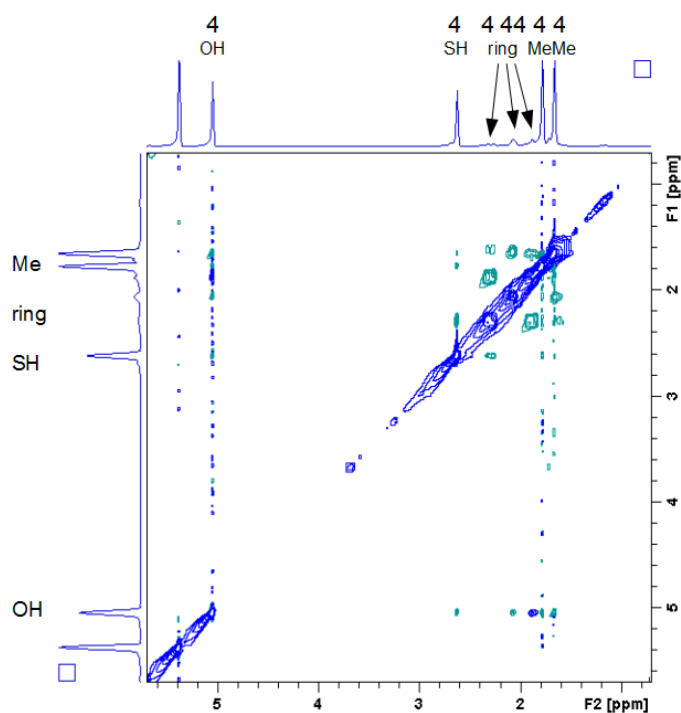

Figure S4.  $^1\text{H}$ -NOESY spectrum of compound **MTPO** (3.0 mg in 0.6 ml  $\text{CD}_2\text{Cl}_2$ ) after irradiation for 4 hours with UV-light at 198 K resulting in almost pure **4**. The line assignment is shown with numbers and arrows. Mixing time was 1.2 s.

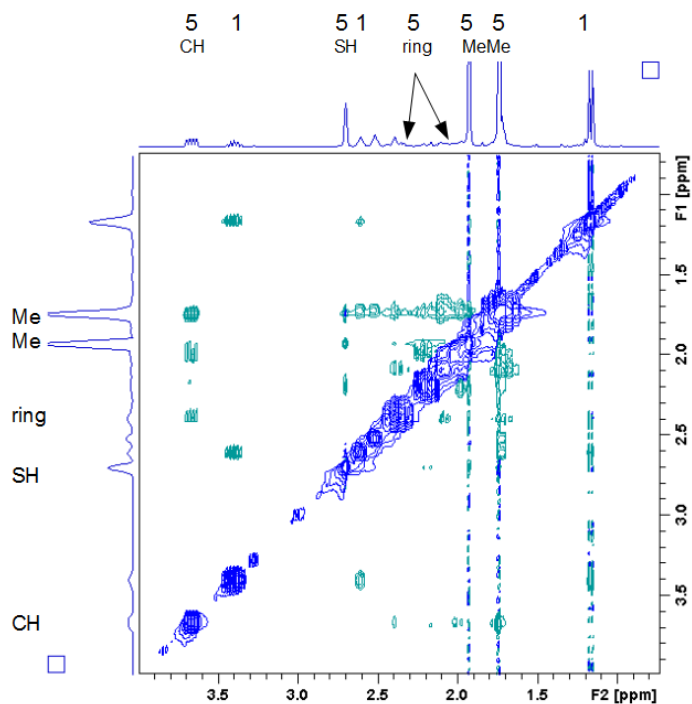

Figure S5.  $^1\text{H}$ -NOESY spectrum of compound **MTPO** (6.0 mg in 0.6 ml  $\text{CD}_2\text{Cl}_2$ ) after irradiating for 16 hours with UV-light at 198 K and storing at room temperature for 2 hours resulting in **5** and **MTPO** mixture measured at 238 K. The quartz rod was fixed above the meniscus during irradiation. The line assignment is shown with numbers and arrows. Mixing time was 1.5 s.

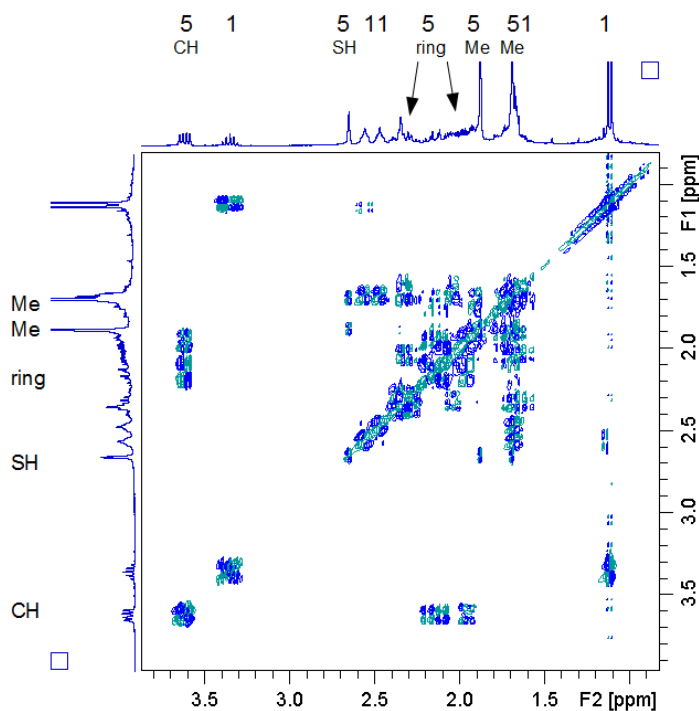

Figure S6.  $^1\text{H}$ -COSY spectrum of compound **MTPO** (6.0 mg in 0.6 ml  $\text{CD}_2\text{Cl}_2$ ) after irradiating for 16 hours with UV-light at 198 K and storing at room temperature for 2 hours resulting in **5** and **MTPO** mixture measured at 238 K.

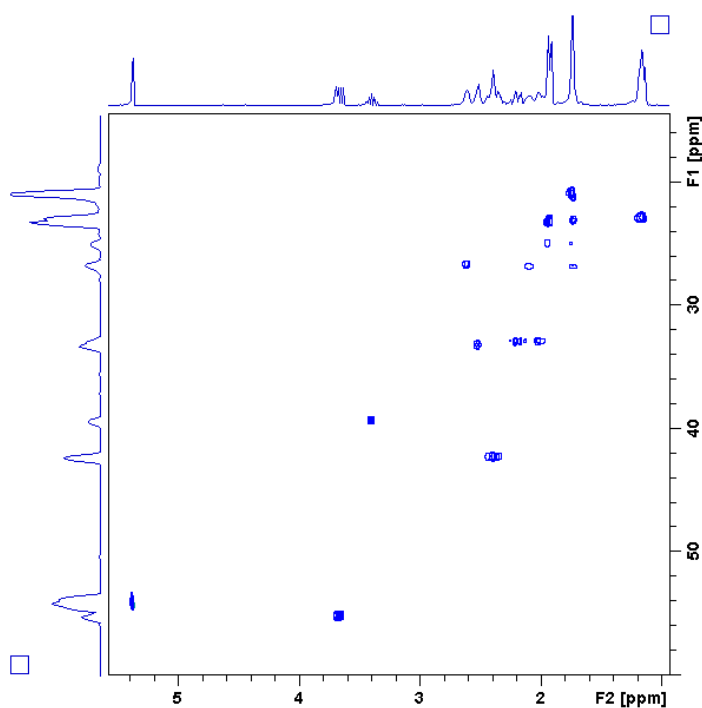

Figure S7.  $^1\text{H}$ - $^{13}\text{C}$  HSQC spectrum of compound **MTPO** (6.0 mg in 0.6 ml  $\text{CD}_2\text{Cl}_2$ ) after irradiating for 16 hours with UV-light at 198 K and storing at room temperature for 2 hours resulting with **5** and **MTPO** mixture measured at 238 K. Optimized for  $J = 130$  Hz.

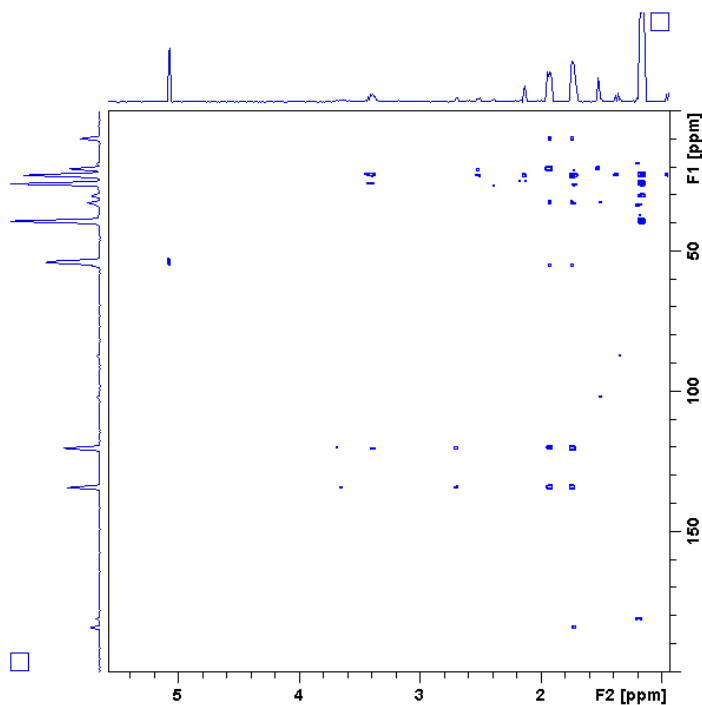

Figure S8.  $^1\text{H}$ - $^{13}\text{C}$  HMBC spectrum of compound **MTPO** (6.0 mg in 0.6 ml  $\text{CD}_2\text{Cl}_2$ ) after irradiating for 16 hours with UV-light at 198 K and storing at room temperature for 2 hours resulting with **5** and **MTPO** mixture measured at 238 K. Optimized for  $J = 4$  Hz.



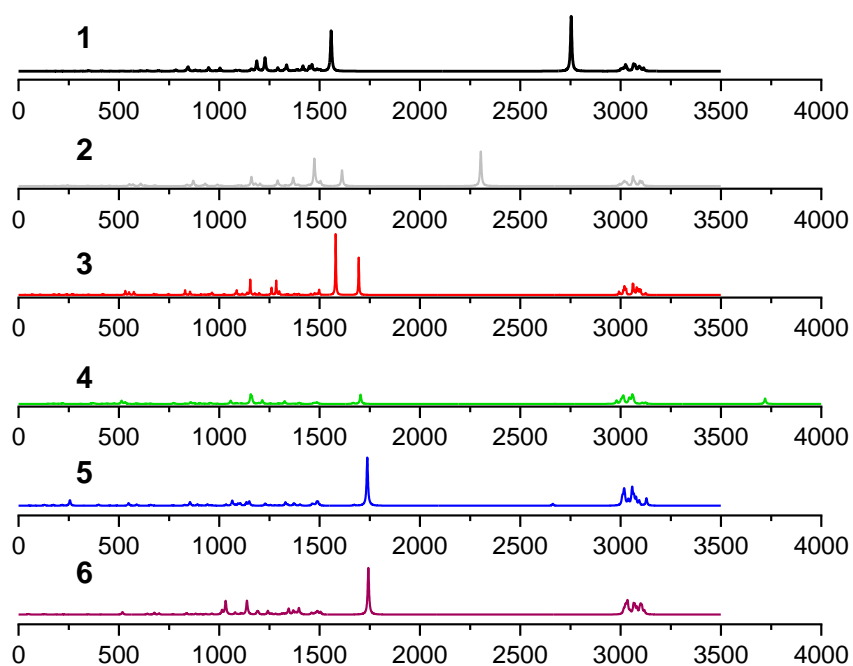

Figure S9. Simulated IR spectra for **1** – **6** in CH<sub>2</sub>Cl<sub>2</sub>, with the same intensity scale for each form.

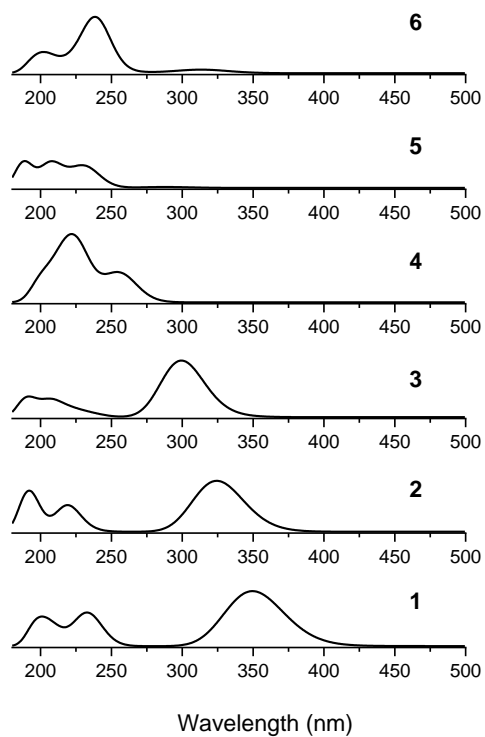

Figure S10. Simulated electronic absorption spectra for **1** – **6** in CH<sub>2</sub>Cl<sub>2</sub>, with the same intensity scale for each form. Half-width at half-height of 2000 cm<sup>-1</sup> was assumed.
